# Supplementary material
Source: PubMed Central journal article supplement (PMC7336541)
Supplement: NIHMS1598786-supplement-1.pdf [file NIHMS1598786-supplement-1.pdf]

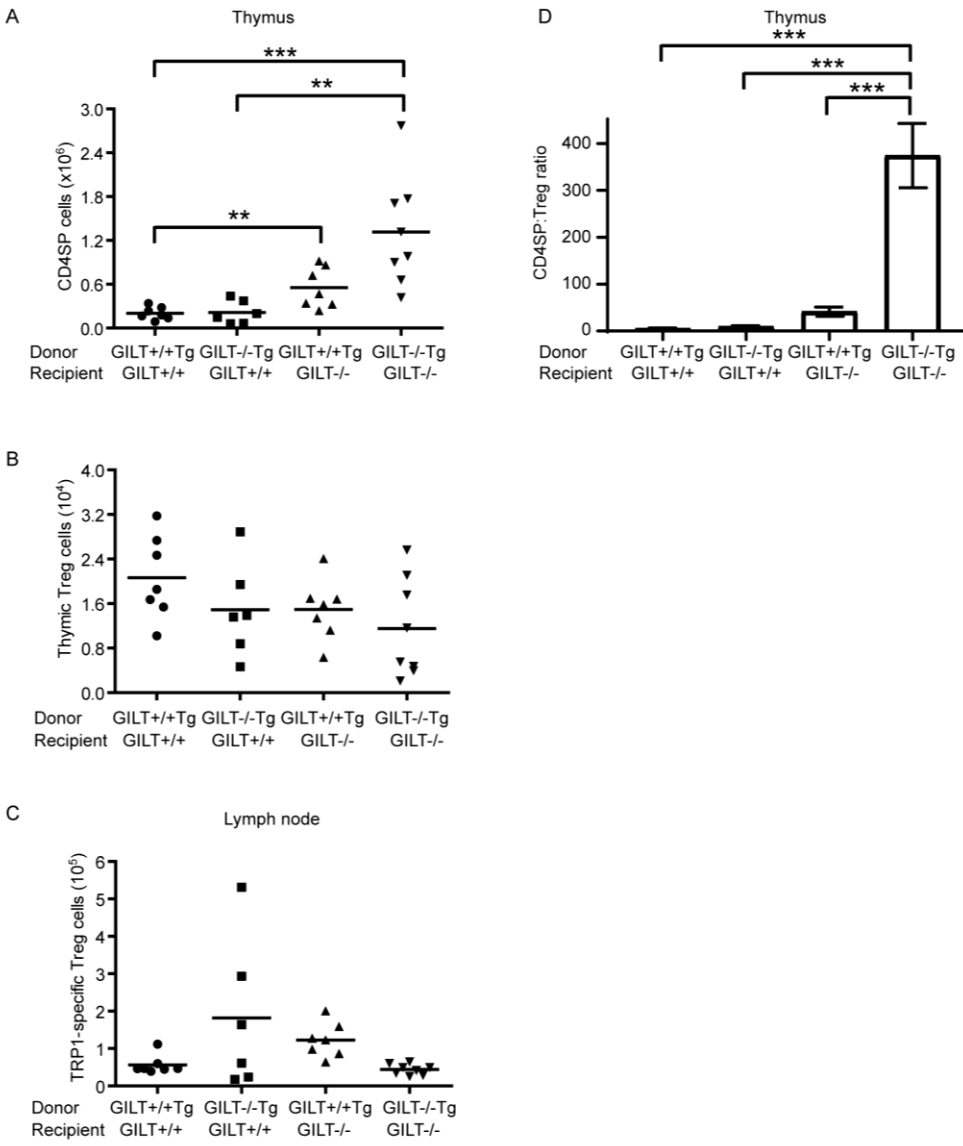

**Supplemental Figure 1.** Lethally irradiated RAG<sup>-/-</sup> or GILT<sup>-/-</sup>RAG<sup>-/-</sup> mice were reconstituted with Ag+GILT<sup>+/+</sup>Tg or Ag+GILT<sup>-/-</sup>Tg bone marrow. After eight weeks, thymocyte and lymph node cell subsets were analyzed. **(A)** Absolute number of CD4SP thymocytes. **(B)** Absolute number of Foxp3<sup>+</sup> V $\beta$ 14+CD4SP thymocytes. **(C)** Absolute number of Foxp3<sup>+</sup> V $\beta$ 14+CD4+ lymph node cells. **(D)** Ratio of CD4SPV $\beta$ 14+Foxp3<sup>-</sup>:CD4SPV $\beta$ 14+Foxp3<sup>+</sup> cells in the thymus. Gating as in Fig. 4. Data points represent individual mice in two pooled experiments. \*\*,  $p < 0.01$ , \*\*\*,  $p < 0.001$ .

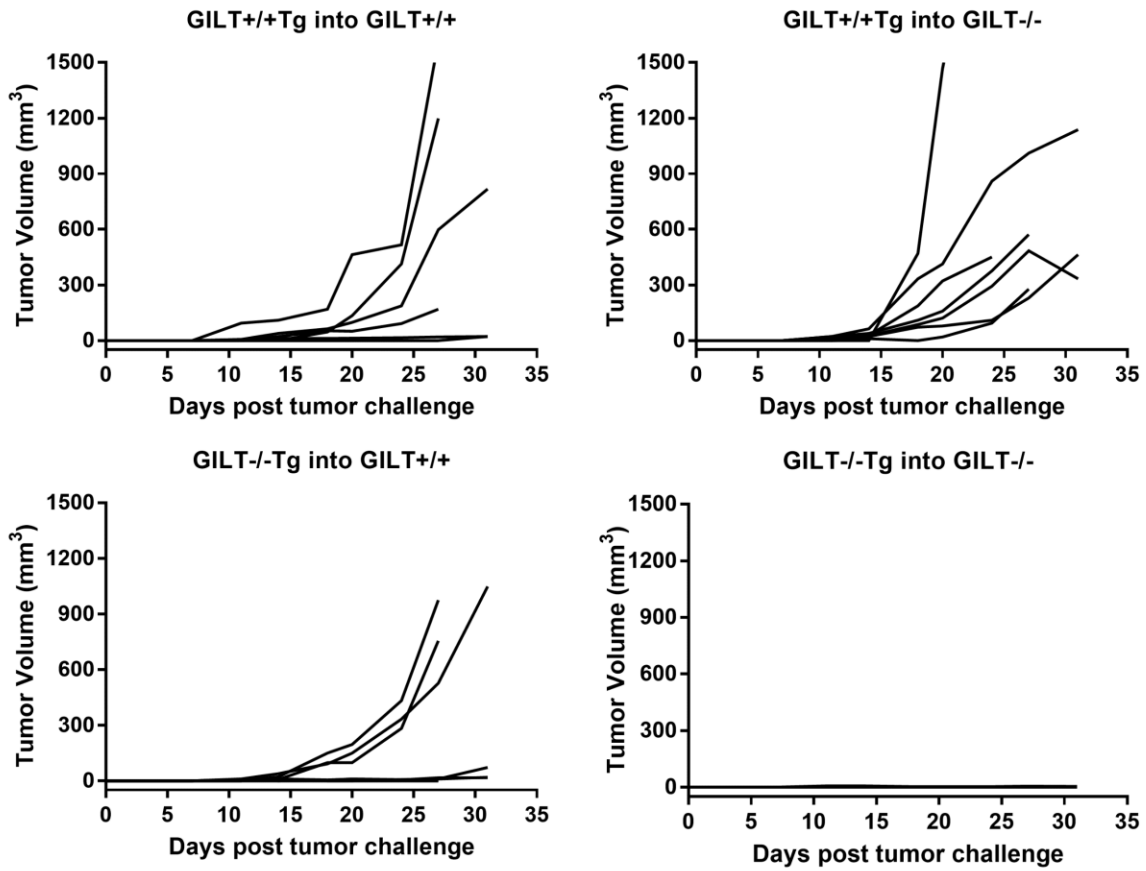

**Supplemental Figure 2.** Lethally irradiated RAG<sup>-/-</sup> or GILT<sup>-/-</sup>RAG<sup>-/-</sup> mice were reconstituted with bone marrow from Ag+GILT<sup>+/+</sup>Tg or Ag+GILT<sup>-/-</sup>Tg mice. After eight weeks, mice were s.c. challenged with B16.F10 melanoma. Tumor volume (mm<sup>3</sup>) curves for individual mice are shown for each group. Data represent two pooled experiments with GILT<sup>+/+</sup>Tg into GILT<sup>+/+</sup> n = 7 mice, GILT<sup>+/+</sup>Tg into GILT<sup>-/-</sup> n = 7 mice, GILT<sup>-/-</sup>Tg into GILT<sup>+/+</sup> n = 8 mice, GILT<sup>-/-</sup>Tg into GILT<sup>-/-</sup> n = 8 mice.
